# 1 **Osmolarity-regulated swelling initiates egg activation in *Drosophila***

2 Anna H. York-Andersen, Benjamin W. Wood, Elise L. Wilby, Alexander S. Berry and Timothy T.

3 Weil<sup>‡</sup>

4 Department of Zoology, University of Cambridge, Downing Street, Cambridge, CB2 3EJ, UK

5 <sup>‡</sup>Author for correspondence (e-mail: [tw419@cam.ac.uk](mailto:tw419@cam.ac.uk))

## 6 **ABSTRACT**

7 Egg activation is a series of highly coordinated processes that prepare the mature oocyte  
8 for embryogenesis. Typically associated with fertilisation, egg activation results in many  
9 downstream outcomes, including the resumption of the meiotic cell cycle, translation of  
10 maternal mRNAs and cross-linking of the vitelline membrane. While some aspects of egg  
11 activation, such as initiation factors in mammals and environmental cues in sea animals,  
12 have been well-documented, the mechanics of egg activation in insects are less well  
13 understood. For many insects, egg activation can be triggered independently of  
14 fertilisation. In *Drosophila melanogaster*, egg activation occurs in the oviduct resulting in  
15 a single calcium wave propagating from the posterior pole of the oocyte.

16 Here we use physical manipulations, genetics and live imaging to demonstrate the  
17 requirement of a volume increase for calcium entry at egg activation in mature *Drosophila*  
18 oocytes. The addition of water, modified with sucrose to a specific osmolarity, is sufficient  
19 to trigger the calcium wave in the mature oocyte and the downstream events associated  
20 with egg activation. We show that the swelling process is regulated by the conserved  
21 osmoregulatory channels, aquaporins (AQPs) and DEGenerin/Epithelial Na<sup>+</sup>  
22 (DEG/ENaC) channels. Furthermore, through pharmacological and genetic disruption, we  
23 reveal a concentration-dependent requirement of Trpm channels to transport calcium,  
24 most likely from the perivitelline space, across the plasma membrane into the mature  
25 oocyte.

26 Our data establishes osmotic pressure as the mechanism that initiates egg activation in  
27 *Drosophila* and is consistent with previous work from evolutionarily distant insects,  
28 including dragonflies and mosquitos, and shows remarkable similarities to the mechanism  
29 of egg activation in some plants.

## 30 INTRODUCTION

31 Egg activation is a conserved process that prepares a mature oocyte for embryogenesis.  
32 It actuates many essential cellular processes including the resumption of meiosis,  
33 modification of the outer membrane, post-transcriptional regulation of maternal mRNAs  
34 and broad changes in the cytoskeletal environment [1–3]. This process requires a  
35 transient increase of intracellular calcium, often referred to as a calcium wave(s), with  
36 multiple waves observed in mammals and ascidians, compared to a single wave in  
37 *Xenopus laevis*, *Danio rerio* and *Drosophila melanogaster* [4–6].

38 Species variation is also documented in the initiation mechanism and source of calcium  
39 required for the cytoplasmic rise [1,4]. In vertebrates and some invertebrates, egg  
40 activation is dependent on fertilisation in which sperm entry introduces Phospholipase C  
41 enzymes generating a calcium efflux from the endoplasmic reticulum [2,7].  
42 Comparatively, egg activation in other invertebrates can be independent of fertilisation  
43 and initiated by external factors [8]. For example, the ionic composition of the solution  
44 external to the oocyte is required in the starfish *Asterina pectinifera*, as chelation of  
45 sodium ions in seawater disrupted the resumption of meiosis [9,10]. While in the shrimp  
46 *Siconia ingentis*, egg activation requires the presence of magnesium ions in seawater  
47 [11]. Interestingly, in the stick insect *Catrasius morosus*, exposure of the oocyte to  
48 oxygen in the air results in the resumption of meiosis [12].

49 An alternative external cue of egg activation is the application of mechanical pressure on  
50 the oocyte plasma membrane exemplified by the eggs of the wasp *Pimpa turionellae*,  
51 which are activated when squeezed through a polythene capillary [13,14]. This physical  
52 stress is proposed to displace the maternal nucleus and result in the resumption of the  
53 cell cycle. Similarly, the eggs of *Drosophila mercatorum* are thought to be activated by  
54 the pressure from the genital ducts [12]. Tension in the plasma membrane can also be  
55 generated by a change in the osmolarity of the external solution (which we will refer to as  
56 'osmotic pressure' henceforth). Prior to egg activation, the hypertonic environment in the  
57 ovaries is thought to maintain the oocytes in a meiotically-arrested state [15,16].  
58 Subsequent entry of the oocyte into a hypotonic environment results in the egg activation  
59 of dragonfly, mayfly, turnip sawfly and yellow fever mosquito eggs [16–18]. For instance,  
60 upon entry into water, yellow fever mosquito oocytes undergo a visible darkening due to  
61 the increased production and cross-linking of the endochorion at egg activation [19,20].

62 Overall, physical pressure appears to be a conserved mechanism for initiating egg  
63 activation in many insects.

64 Similar to other insects, egg activation in *Drosophila melanogaster* is independent of  
65 fertilisation and occurs during the passage of the mature oocyte through the oviduct [21].  
66 One model suggests that the pressure exerted by the oviduct on the oocyte upon entry  
67 initiates egg activation [8,22]. However, more recent work has shown that external  
68 pressure alone is not sufficient to trigger a calcium wave [5,23]. An alternative model  
69 proposes that osmotic pressure generated by uptake of oviduct fluid leads to the initiation  
70 of egg activation [15]. This is supported by observations that oocytes are visibly  
71 dehydrated whilst in the ovaries, but upon deposition appear turgid and hydrated [15,24].  
72 Rehydration at egg activation can be recapitulated *ex vivo* through the addition of a  
73 hypotonic solution, known as Activation Buffer (AB), which when added to an isolated  
74 mature egg results in swelling and a single calcium wave [5,6,15]. This influx of calcium  
75 requires the Trpm mechanosensitive channel in the plasma membrane and results in the  
76 activation of Plc21C that sustains the wave [8,25,26]. Regulation of calcium entry was  
77 hypothesised to be related to distribution of the Trpm protein in the membrane, as calcium  
78 entry is often seen first at the poles. However, when observed using CRISPR-generated  
79 GFP-tagged Trpm, an even distribution of the protein across the plasma membrane was  
80 evident [27]. Therefore, the precise mechanisms of initiation and regulation of the calcium  
81 wave remain to be elucidated in *Drosophila*.

82 Here, we use live imaging in conjunction with novel physical manipulation,  
83 pharmacological disruption and genetics, to demonstrate the requirement of osmotically  
84 induced swelling for calcium entry and downstream events of *Drosophila* egg activation.  
85 We show that depletion of osmoregulatory machinery, including AQPs and DEG/ENaC  
86 channels, disrupts water homeostasis and egg activation. We provide further evidence  
87 that the movement of calcium ions into the egg is sensitive to levels of functional Trpm.  
88 Our data also argues that the external environment is not the source of calcium for the  
89 wave, but rather the ions are likely to originate from the perivitelline space. Together with  
90 other recent work in the field, our findings reveal that *Drosophila* egg activation has  
91 striking mechanistic similarities to other animals and even some plants.

## 92 RESULTS

### 93 Swelling is required for the initiation and propagation of the calcium wave

94 The likely initiation cues for the calcium wave at *Drosophila* egg activation include  
95 physical pressure applied on the posterior pole by the oviduct or the uptake of the fluid  
96 by the mature oocyte from the oviduct [8,15]. Our previous work has shown that physical  
97 pressure applied to the posterior pole is not sufficient to initiate the calcium wave [5]. This  
98 evidence, together with the observation that the mature oocytes are dehydrated whilst in  
99 the ovary but are turgid by the time they are deposited [15], suggests that swelling might  
100 play a role in the initiation and the propagation of the calcium wave at egg activation.

101 In addition to the initiation of the calcium wave, *ex vivo* dissected mature oocytes show  
102 an increase in oocyte volume, rounding of the oocyte poles and movement of the dorsal  
103 appendages following exposure to AB (Figure 1A). To test if this swelling is required for  
104 the initiation and propagation of the calcium wave, we blocked the ability of the egg to  
105 swell by placing the anterior pole in a plastic capillary with the posterior pole being  
106 exposed to oil (Figure 1B). Upon the addition of AB, the oil is displaced and the calcium  
107 wave initiated as normal. However, the wave did not propagate past the opening of the  
108 capillary (Figure 1B'). An uninhibited calcium wave would normally encompass the whole  
109 oocyte by 3.5 minutes [5]. However, in this case, the wave did not propagate until the egg  
110 was expelled from the capillary. When the whole oocyte was placed in the capillary, as  
111 expected, the calcium wave did not initiate upon the addition of AB (data not shown). This  
112 strongly suggests that swelling is required for the initiation and propagation of the calcium  
113 wave.

114 Our previous work has shown that local pressure or injection of calcium gives a localised  
115 calcium increase, but not a prolonged or broad calcium increase in a form of a wave  
116 [5,23]. To test if a localised internal increase in volume could induce a broad calcium  
117 event, we used a microneedle to inject halocarbon oil into a mature egg chamber mounted  
118 in halocarbon oil. Initial puncturing of the egg chamber resulted in a localised increase in  
119 calcium consistent with our previous results (Figure 1C,  $t = 0'$ ). Injection of oil into the  
120 centre of the egg chamber resulted in a broad posterior calcium increase (Figure 1C,  $t =$   
121  $1', 2'$ ). This response is noticeably different from previous experiments where oocytes  
122 were manipulated with a microneedle or had physical pressure applied. This data  
123 suggests swelling is necessary for the calcium propagation and is sufficient for the  
124 initiation of a broad calcium increase.

## 125 **Osmotic pressure initiates the calcium wave**

126 In order to further test the function of swelling, we established a classification system that  
127 enabled us to categorise calcium events in the egg and quantify our data under different  
128 experimental conditions. We have classified the calcium increase exhibited as four  
129 distinct phenotypes: full wave, cortical increase, partial wave, or no wave. The most  
130 common phenotype is the full wave that initiates from the posterior pole and propagates  
131 across an entire oocyte. This is the standard event that we observe with *ex vivo* egg  
132 activation using AB. We do observe a small percentage of full wave phenotypes that  
133 initiate from the anterior pole. Different to a full wave, an increase in calcium can occur  
134 from multiple places around the cortex. This cortical increase phenotype was originally  
135 observed when egg chambers were exposed to distilled water [5]. These observations  
136 suggest that all parts of the egg have the capacity to allow calcium into the cell and that  
137 there is a regulatory mechanism to control calcium entry. In contrast, the partial wave  
138 phenotype describes the calcium wave that initiates from a pole but does not propagate  
139 across the entire oocyte and recovers prematurely. We do observe some egg chambers  
140 attempting to initiate waves multiple times, without successful propagation of calcium.  
141 Finally, the no wave phenotype describes an absence of a calcium increase anywhere in  
142 the egg for the length of the experiment. We observe this in a small percentage of eggs  
143 that are likely to have a major defect in development prior to dissection.

144 Our data indicates the requirement of swelling for the calcium wave to occur at egg  
145 activation (Figure 1B). One way the egg could undergo swelling is by exposure to a  
146 hypotonic solution, which would cause an influx of water and subsequently generate  
147 osmotic pressure within the mature oocyte. To test whether or not the uptake of water  
148 alone could act as an initiation cue for the calcium wave at egg activation, *ex vivo* egg  
149 chambers were treated with a sucrose and water solution (SW) of the same solute content  
150 as AB, measured in osmolarity (260 mOsm). The SW solution has no ions added and is  
151 very different from other buffers used to activate eggs. Sucrose is highly soluble in water  
152 and is neutrally charged making it suitable for varying the osmolarity of the solution. Upon  
153 the addition of SW, the egg chambers exhibited a similar proportion of the calcium wave  
154 phenotypes to AB (Figure 2A).

155 To further test whether the osmolarity of an external solution is important for the initiation  
156 of an internal calcium increase, egg chambers were exposed to a single SW solution from  
157 a range of osmolarities. The highest percentage of full calcium waves was observed at

158 350 mOsm, with this percentage declining rapidly by 570 mOsm (Figure 2A'). The highest  
159 proportion of cortical increases was detected at 0 mOsm (Figure 2A'), consistent with  
160 predictions that an excessive volume increase cannot be regulated by the egg and results  
161 in an uncontrolled calcium increase. The partial and no wave phenotypes became more  
162 predominant with an increase in the osmolarity. This suggests that high osmolarity  
163 solutions do not increase the internal volume that is required for the egg to complete a  
164 calcium event. Together, these findings suggest that a controlled amount of water  
165 entering the egg is important for regulating a calcium event at egg activation.

## 166 **Osmotic pressure results in the resumption of the meiotic cell cycle**

167 Previous work has shown that the addition of AB to mature egg chambers can initiate  
168 major cellular events associated with *Drosophila* egg activation, including the resumption  
169 of the cell cycle and P body dispersion [5,28]. In a non-activated oocyte, the meiotic  
170 spindle is parallel to the cortex and is observed near the base of the dorsal appendages  
171 at the anterior pole [28–30]. Upon egg activation, the spindle undergoes a morphological  
172 change within 10 minutes, marking the resumption of the cell cycle [28].

173 To address whether osmotic pressure alone results in this change, we used Jupiter-  
174 mCherry to label the meiotic spindle and exposed these mature egg chambers to SW  
175 solution (260 mOsm). Before exposure, the spindle is a narrow ellipse with dark regions  
176 in the middle where the DNA resides (Figure 2B,C,D). Upon addition of SW and AB  
177 (positive control) the spindle shows a significant increase in width (70%), which is  
178 indicative of spindle contraction at Anaphase I (Figure 2B',C',E). When treated with  
179 Schneider's *Drosophila* Medium (negative control) the spindle did not undergo any  
180 detectable morphological change (Figure 2D',E). Together, this supports the conclusion  
181 that water uptake and subsequent internal pressure is sufficient to initiate the Metaphase  
182 I-to-Anaphase I transition of the meiotic spindle.

183 To further verify the role of osmotic pressure we investigated the dispersion of P bodies,  
184 an established hallmark of egg activation [5,31]. When mature egg chambers expressing  
185 a conserved P body marker are exposed to SW (260 mOsm), we observe a normal  
186 dispersion phenotype (Figure 2F-F'). Taken together, this data suggests that an increase  
187 in internal volume caused by osmotic pressure triggers downstream events of egg  
188 activation.

## 189 **Water homeostasis is required for egg activation**

190 The increase in internal volume observed in osmolarity experiments is regulated by water  
191 influx and efflux. To test if water homeostasis is required to regulate swelling in mature  
192 oocytes, we explored the role of the water-pore channels, AQPs, which are known to  
193 coordinate the movement of water molecules [32,33]. By adding copper sulfate (a broad  
194 AQP channel antagonist) into AB we do not observe a calcium wave (Figure 3A).

195 There is only one AQP channel, Prip, that is known to be expressed in the *Drosophila*  
196 ovarian tissue (*Drosophila* Fly Atlas). To investigate the role of Prip at egg activation we  
197 used knock-down tools in heterozygous deficiency or mutant backgrounds since the  
198 homozygous mutant was lethal. Upon the addition of AB, the number of oocytes showing  
199 a calcium wave significantly decreased in egg chambers expressing various AQP  
200 deficient backgrounds (Figure 3A). We further investigated the effect of Prip disruption by  
201 observing the time series of *ex vivo* activated eggs and found that half of these eggs  
202 rupture and leak cytoplasm shortly after the addition of AB (Figure 3B). Interestingly,  
203 some eggs were still able to initiate and propagate a calcium wave despite rupturing. This  
204 data is strongly suggestive of a subsequent requirement for Prip in mediating water  
205 homeostasis at egg activation.

206 Similar effects were observed in egg chambers expressing reduced levels of *ripped-*  
207 *pocket* (*rpk*), a member of the mechanosensitive channels family DEG/ENaC known to  
208 be involved in transducing changes in osmotic pressure [34–36]. When activated, these  
209 egg chambers show a cortical calcium increase, rupture of the plasma membrane and  
210 leaking of the cytoplasm (Figure 3C). This phenotype is similar to when eggs are exposed  
211 to low osmolarity solutions (Figure 2A'), suggesting that *rpk* is required to mediate water  
212 entry. Together, this data suggests the role of AQP and DEG/ENaC channels is to  
213 coordinate optimal swelling and water homeostasis at egg activation.

## 214 **External calcium is not required for initiation and propagation of the calcium wave**

215 In many animals, external and/or internal calcium is required for the calcium rise at egg  
216 activation [4]. To investigate the source of calcium at *Drosophila* egg activation, *ex vivo*  
217 mature egg chambers were treated with AB containing the calcium chelator BAPTA.  
218 These eggs exhibited typical swelling and a full calcium wave (Figure 4A), suggesting  
219 that external calcium from the surrounding solution is not required. To further validate this  
220 experiment we depleted internal calcium by pre-incubating egg chambers with

221 membrane-permeable BAPTA-AM (with solubilising agent PF-127). The addition of AB  
222 with this chelator significantly reduced the number of calcium events (Figure 4A).  
223 Together, these findings point towards the source of calcium residing within the mature  
224 egg chamber.

225 There are several potential internal calcium sources in the mature egg chamber, including  
226 the perivitelline space surrounding the mature oocyte [22]. The perivitelline space has  
227 been shown to consist of different ions, including calcium in the early *Drosophila* embryo  
228 [37]. However, it remains technically not possible to extract this fluid from the mature egg  
229 chamber due to the dehydrated morphology. One candidate, previously shown to be  
230 involved in coordinating the entry of calcium from the perivitelline space into the oocyte,  
231 is the mechanosensitive channel Transient Receptor Potential M (Trpm) [26].

232 To further investigate the role of Trpm, we utilised a transgenic line from the Berkeley  
233 *Drosophila* Genome Project which is a transposon P-element insertion in the 39th splice  
234 site which results in an imprecise deletion of three exons of Trpm [38,39]. Upon the  
235 addition of AB, these mature egg chambers swelled as expected, but fail to initiate a  
236 calcium increase (Figure 4B). We further tested the requirement of Trpm using a germline  
237 RNAi, which in heterozygous egg chambers resulted in a significant reduction in calcium  
238 waves (Figure 4B).

239 Together, this suggests that there could be a concentration-dependent response of Trpm.  
240 To test this hypothesis, egg chambers wild-type for Trpm were incubated with different  
241 concentrations of Carvacrol, a broad Trpm inhibitor [40]. The addition of AB with Carvacrol  
242 resulted in a significant decrease of the number of eggs with a calcium wave at a range  
243 of concentrations (Figure 4C). These data support the findings that Trpm is involved in  
244 regulating the entry of calcium into the mature oocyte at egg activation. Since Trpm  
245 channels are located in the cell membrane [26], it is likely that their role is to allow calcium  
246 from the perivitelline space to enter the oocyte at activation.



## 247 **DISCUSSION**

### 248 **Model of *Drosophila* egg activation**

249 In summary, our data shows that the calcium wave and characteristic downstream events  
250 associated with egg activation are initiated by osmotic pressure generated by the uptake  
251 of external fluid. We show that AQP and DEG/ENaC channels are required for mediating  
252 water homeostasis to withstand the rise in osmotic pressure during egg activation. We  
253 present complementary evidence that the Trpm channel is required for the influx of  
254 calcium, which we show is not supplied from a source outside of the egg chamber.

255 Together with previous work, our data supports the following model of *Drosophila* egg  
256 activation (Figure 5): (1) at ovulation, the meiotically-arrested mature oocyte passes into  
257 the lateral and then common oviduct; (2) the mature oocyte then takes up fluid due to the  
258 difference in osmolarity between the oviduct fluid and the ooplasm; (3) the increase in  
259 volume results in tension at the plasma membrane and dispersion of the cortical actin;  
260 (4) decreased density of cortical actin at the poles, prior to dispersion, primes these  
261 regions for calcium entry; (5) calcium enters the egg from the perivitelline space through  
262 the mechanosensitive Trpm channels in the plasma membrane; (6) starting at the  
263 posterior pole, further increase in intracellular calcium is relayed across the oocyte by the  
264 opening of the neighbouring Trpm channels via the dispersion of the cortical actin  
265 cytoskeleton at the lateral sides, resulting in the calcium wave propagation across the  
266 oocyte. (7) The calcium wave is then followed by an F-actin wavefront, which ensures the  
267 reorganisation of the actin cytoskeleton; (8) intracellular calcium returns to basal levels,  
268 likely through channels that transport calcium back into the perivitelline space.  
269 Collectively, the single calcium wave prepares the oocyte for pronuclear fusion and  
270 embryogenesis.

271 Osmotic pressure is a common mechanism for a volume increase and a rise in  
272 intracellular calcium levels, exemplified by intestinal epithelial cells, human osteoblast-  
273 like cells, rat astrocytes and cancer cell lines [41–44]. It is hypothesised that cells sense  
274 an increase in cell volume via intracellular solute, membrane-bound and/or cytoskeletal  
275 sensors [45]. The application of osmotic pressure seems to be a conserved initiation cue  
276 for egg activation in insects. Previous work has shown that the immersion of the  
277 oviposited mature oocytes of the yellow fever mosquito into water can resume oocyte  
278 development [46]. Similarly, for oocytes of the turnip sawfly and the malaria vector  
279 mosquito, egg activation can be initiated by placing the oocytes into water [16,17].

280 *Drosophila* is currently the only example of an insect in which the mature oocytes have  
281 been shown to exhibit an increase in intracellular calcium in response to the addition of  
282 hypotonic solution [5,6]. Our results presented here show that osmotic pressure acts as  
283 the initiation cue of the calcium wave at *Drosophila* egg activation.

#### 284 **AQP and Rpk requirement in water homeostasis**

285 It is essential to regulate cellular volume in response to changes in osmotic pressure.  
286 This is often achieved by AQPs, a conserved channel known to control the influx and  
287 efflux of water during cellular processes, including cell migration, neuroexcitation and  
288 epithelial fluid transport [32]. In *Drosophila*, our findings show the AQP *Prip* is required to  
289 maintain an optimal volume change at egg activation. In a *Prip* depleted background we  
290 observed eggs initially swelling but rupturing shortly after. This phenotype suggests that  
291 *Prip* is required to remove water from the oocyte as the egg swells during egg activation.

292 In addition, we show that the depletion of the DEG/ENaC channel, *Rpk*, also results in  
293 oocytes rupturing when activated. We propose that *Rpk* mediates optimal swelling  
294 through interactions with the cortical actin cytoskeleton, which we have previously shown  
295 to be re-organised at egg activation [23]. This hypothesis is supported by (1) co-  
296 immunoprecipitation studies in MDCK cells in which DEG/ENaC channels bind F-actin  
297 via the COOH terminus of  $\alpha$ -ENaC and (2) mechanical pressure experiments that activate  
298 DEG/ENaC channels resulting in the stiffening of the cortical actin in vascular endothelial  
299 cells [47,48]. We therefore propose that *Rpk* is stabilising the cortical actin to withstand  
300 the increase in volume at activation.

#### 301 **Role of osmotic pressure and TRP channels at egg activation**

302 Recent work on germ-line knockout mutants in *Drosophila* have established the  
303 requirement of mechanosensitive *Trpm* channels in mediating the calcium influx at egg  
304 activation [26]. We corroborate this requirement using different mutants, RNAi and  
305 pharmacological disruption. Our data supports a model in which osmotic pressure  
306 generates tension in the plasma membrane and the cortical actin resulting in the opening  
307 of *Trpm* channels and subsequent calcium entry. Interestingly, the mammalian homolog  
308 TRPM3 is also activated in HEK293 cells by the application of a hypotonic solution,  
309 resulting in an intracellular calcium increase [49]. Similarly, in mammalian sensory  
310 neurones, TRPV4 and TRPV1 respond to changes in osmotic pressure [50–53].

311 Calcium entry mediated by TRP channels appears to be a conserved mechanism in the  
312 eggs of many animals. This was first shown in *Xenopus* oocytes where a mechanical  
313 stimulus resulted in the opening of TRPC1 [54]. More recently, mouse oocytes have been  
314 shown to require TRPV3 for the calcium intracellular increase and were affected by  
315 overexpression and the application of 2-APB [55]. In addition, TRPM7 was also shown to  
316 be essential for the calcium influx at mouse egg activation [56]. Finally, in *Caenorhabditis*  
317 *elegans* loss of the TRP3 channel resulted in a failure to show a calcium rise at egg  
318 activation [57]. Taken together these examples highlight a conserved role of TRP  
319 channels in mediating successful egg activation through calcium entry.

### 320 **The source of calcium at *Drosophila* egg activation**

321 Calcium waves at egg activation can be mediated by intracellular and/or external calcium  
322 sources [4]. In *Drosophila*, *Trpm* regulates calcium entry across the plasma membrane  
323 suggesting that the calcium source is external to the oocyte. Paradoxically, we also show  
324 that external calcium is not required for a wild-type calcium wave. We argue that this data  
325 is compatible and point to the perivitelline space, situated between the oocyte plasma  
326 membrane and the vitelline membrane, as the calcium store. The composition of the  
327 perivitelline space in the egg chamber is currently unknown. However, in the early  
328 embryo, it has been shown to consist of many ions including calcium [37]. Our work  
329 supports a model where the perivitelline space is pre-loaded with calcium during  
330 oogenesis which enters through *Trpm* channels when the egg swells. This model is  
331 supported by our data showing that the injection of oil (devoid of calcium) is sufficient to  
332 induce a calcium rise in the oocyte.

### 333 **The *Drosophila* calcium wave is an example of a “slow” calcium wave**

334 While calcium waves can be classified by the source of ions, they can alternatively be  
335 compared based on how fast they propagate [58]. In most animals, calcium waves at egg  
336 activation are classified as fast, travelling at  $\sim 10\text{-}30\ \mu\text{m}/\text{sec}$  [59]. However, some wave(s)  
337 propagate at  $\sim 0.2\text{-}2\ \mu\text{m}/\text{sec}$  and are classified as slow. This includes calcium influx at  
338 egg activation in maize eggs which propagates at  $1.13\ \mu\text{m}/\text{sec}$  and interestingly, requires  
339 mechanosensitive channels [60–62]. This is very similar to observations in *Drosophila*,  
340 where mechanosensitive channels and the actin cytoskeleton are required for a slow  
341 wave that propagates at  $\sim 1.5\ \mu\text{m}/\text{sec}$ . In fact, the general mechanism for a slow calcium  
342 wave [56] is strikingly similar to what we propose is occurring at *Drosophila* egg activation.

343 Overall, aspects of the calcium wave, and more broadly egg activation, in *Drosophila*  
344 appear to be conserved with a variety of other organisms. Further analysis in flies will  
345 likely show even more similarities and inform our overall understanding of egg activation  
346 in all species.

## 347 MATERIALS AND METHODS

### 348 Fly stocks

349 The following fly stocks were used: *UAS<sup>t</sup>-myristoylated(myr)-GCaMP5*; *mata-*  
350 *GAL4::VP16* (BL7063) and *UAS<sup>p</sup>-GCaMP3* [6]; *tub-GAL4VP16* (Siegfried Roth); *jupiter-*  
351 *mCherry* (Paul Conduit); *me31B::GFP* [63]; *ripped-pocket RNAi*  
352 (P{TRiP.HMS01973}attP40, BL39053); *trpm mutant* (P{EPgy2}TrpmEY01618/CyO,  
353 BL15365); *trpm RNAi* (BL35581 and BL44503); *prip mutant* (P{SUPor-P}PripKG08662,  
354 BL14750); *prip RNAi* (P{TRiP.GLC01619}attP2, BL44464); *prip RNAi*  
355 (P{TRiP.HMC03097}attP40, BL50695); deficiency (for *prip*) (*Df(2R)BSC160/CyO*,  
356 BL9595). Stocks were raised on standard cornmeal-agar medium at 21°C or 25°C. For  
357 dissection of mature oocytes, mated females were fattened on yeast for 48 hours at 25°C.

### 358 Reagents

359 BAPTA (Sigma-Aldrich) was used at a final concentration of 10 µM; BAPTA-AM + PF-127  
360 (Sigma-Aldrich) was used at a final concentration of 30µM; Carvacrol (Sigma-Aldrich)  
361 used at 300-700µm. For the above reagents, standard preparation protocols were used  
362 as according to Sigma-Aldrich.

363 Activation Buffer (AB) containing 3.3 mM NaH<sub>2</sub>PO<sub>4</sub>, 16.6 mM KH<sub>2</sub>PO<sub>4</sub>, 10 mM NaCl,  
364 50 mM KCl, 5% polyethylene glycol 8000, 2 mM CaCl<sub>2</sub>, brought to pH 6.4 with a 1:5 ratio  
365 of NaOH:KOH [15]; Gibco Schneider's *Drosophila* Medium (Thermo Fisher); Series95  
366 halocarbon oil (KMZ Chemicals); EZ-Squeeze tube 125 µM (Cooper Surgical). For  
367 osmolarity experiments, sucrose (Sigma-Aldrich) was directly dissolved into distilled  
368 water and the osmolarity was measured using an osmometer (Löser).

### 369 Preparation of mature oocyte for live imaging

370 Mature oocytes were dissected from the ovaries from fattened flies using a probe and  
371 fine forceps [64]. Dissected oocytes were placed in series 95 halocarbon oil (KMZ  
372 Chemicals) on 22 × 40 coverslips, aligned parallel to each other to maximise the  
373 acquisition area for imaging, left to settle for 10 minutes, and incubated in solution *ex vivo*  
374 [64].

375 **Imaging**

376 Time-series were acquired with an inverted Leica SP5, under 20x 0.7NA immersion  
377 objective. The Z-stacks were acquired at 2  $\mu\text{m}$  steps from the first visible plane to 40  $\mu\text{m}$   
378 deep. The Z-stacks were presented as maximum projections of the 40  $\mu\text{m}$  unless stated  
379 otherwise.

380 **Oil injection**

381 Preparation for microinjection was carried out with a Femtotips II microinjection needle  
382 (Eppendorf) and a gas pressure injection system were used to inject oil into the Stage 14  
383 egg chambers [31]. Imaging was performed simultaneously with injection on a  
384 DeltaVision wide-field microscope (Applied Precision) using a 20x 0.75NA numerical  
385 aperture.

386 **Quantifications and analysis**

387 The calcium wave data was analysed statistically using Fisher's exact test with P-values  
388 ( $P < 0.05$  considered significantly different) [6]. The spindle dimensions were quantified  
389 and statistically analysed using an unpaired T-test with  $P < 0.05$  values showing significant  
390 difference. The number of asterisks represents the P-value: (\*)  $P \leq 0.05$ ; (\*\*)  $P \leq 0.01$ ; (\*\*\*)  
391  $P \leq 0.001$ .

392 **ACKNOWLEDGEMENTS**

393 We are grateful to Richard Parton for experimental and technical advice; Mariana  
394 Wolfner, Matthias Landgraf, Howard Baylis, José Casal, Peter Lawrence for feedback,  
395 discussions and advice; Richard York-Weaving for feedback on the manuscript; the  
396 Zoology Imaging Facility and Matt Wayland for assistance with microscopy; Siegfried  
397 Roth, Paul Conduit and Mariana Wolfner for fly stocks; and funding from the University of  
398 Cambridge ISSF grant number 097814 (to TTW), Department of Zoology Balfour  
399 Studentship (to AHYA), BBSRC DTP studentship (to BWW), BBSRC DTP studentship  
400 (ELW), and Sir Isaac Newton Trust Research Grant (Ref 18.07ii(c)).

401 **Conflicts of interest**

402 The authors declare that there are no conflicts of interest.

403

## FIGURE 1

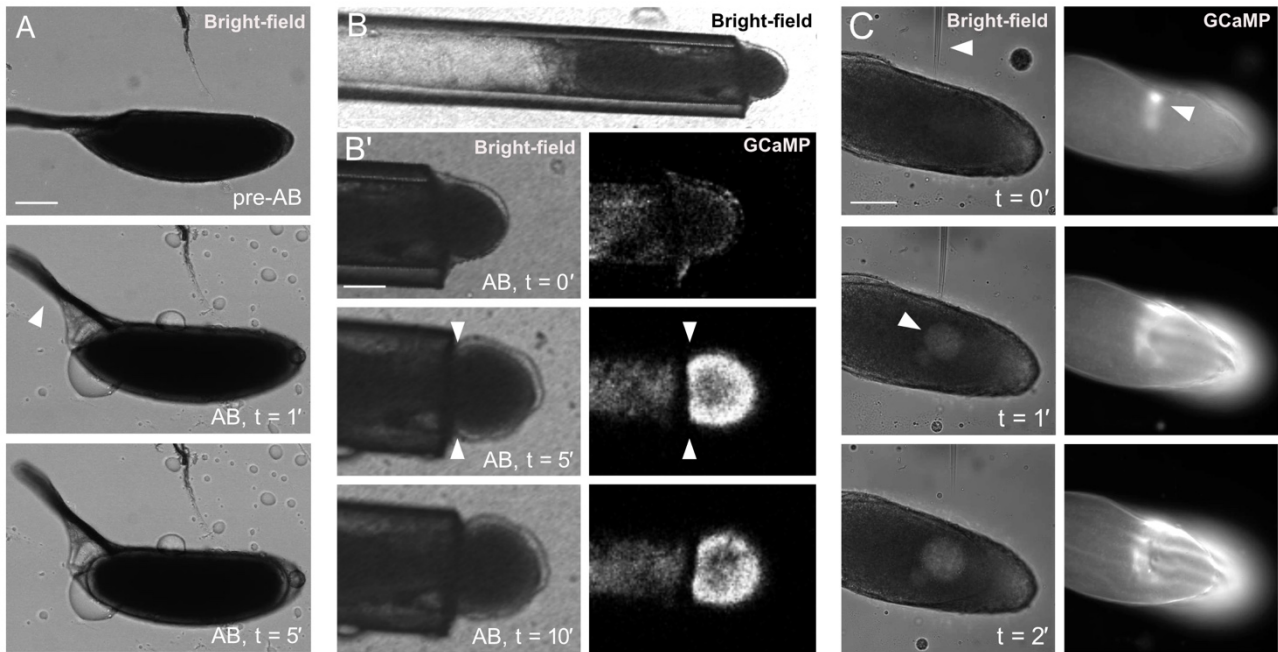

404 **Figure 1. Egg chamber swelling is required for the initiation and propagation of the calcium**  
405 **wave**

406 Time series showing *ex-vivo* mature egg chambers under bright-field (A,B,B',C) and expressing  
407 *UAS-myrGCaMP5* (B,B',C). Images represent a single plane.

408 (A) Time series of a wild-type egg chamber pre- and post-addition of activation buffer (AB). Upon  
409 the addition of AB, the egg chamber undergoes swelling, the dorsal appendages rise (white  
410 arrowhead, t = 1') and the poles become more rounded (white arrow, t = 5'). Circular droplets  
411 visible on the outside of the egg are oil that was not displaced by AB. Scale bar 100 μm.

412 (B) Bright-field image of an egg chamber, expressing *UAS-myrGCaMP5*, placed in a 125 μm  
413 diameter tube. (B') Time series of the same egg chamber in the tube, with the posterior pole  
414 exposed to AB. The calcium wave initiates normally but does not propagate past the tube opening  
415 (white arrowheads) (n = 15). Scale bar 60 μm.

416 (C) Bright-field image of a mature egg chamber, expressing *UAS-myrGCaMP5*, injected with  
417 halocarbon oil. As the needle enters the oocyte, there is a calcium increase at the point of injection  
418 (white arrowhead, t = 0'). Injected oil is seen as a circle in the cytoplasm of the egg at t = 1' (white  
419 arrowhead) and remains localised (t = 2'). Localised swelling results in an increase in calcium,  
420 which does not propagate (t = 2') (n = 5). Scale bar 100 μm.



421

## FIGURE 2

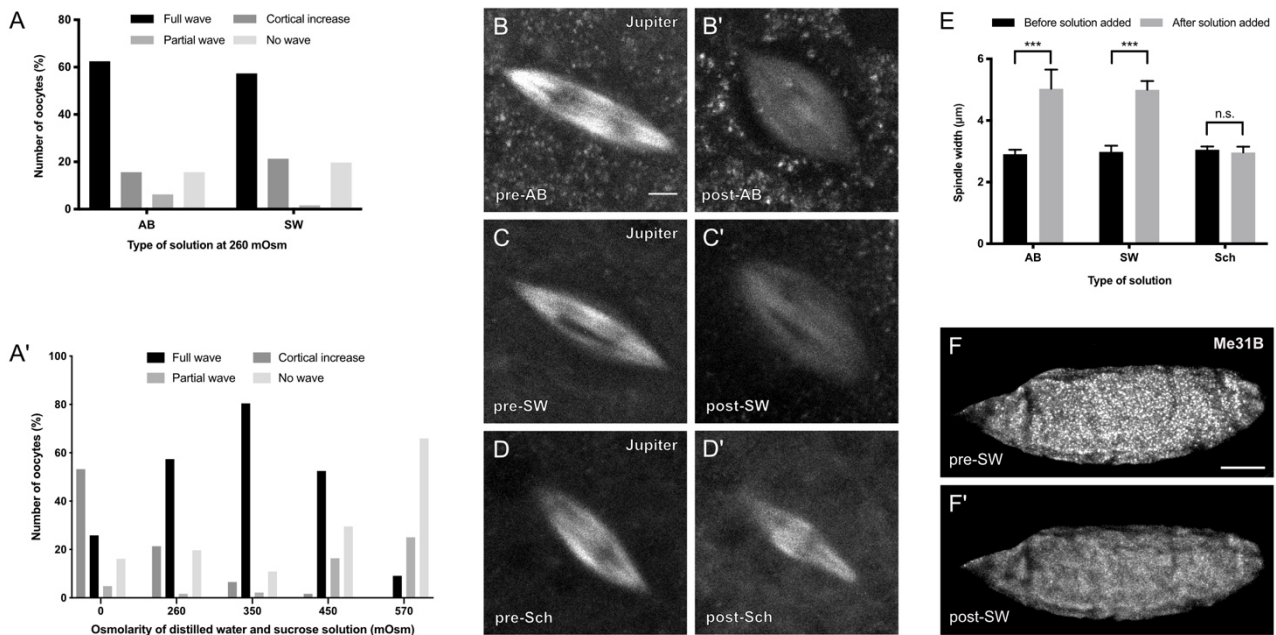

422 **Figure 2: Osmotic pressure initiates the calcium wave and results in rearrangement of the**  
 423 **meiotic spindle and P body dispersion**

424 (A) Data showing activation buffer (AB) or sucrose and water (SW) of 260 mOsm results in a  
 425 similar percentage of the calcium wave phenotypes when added to *ex vivo* egg chambers. (A')  
 426 The data shows the number of mature oocytes activated with SW only, with a range of  
 427 osmolarities from 0-570 mOsm. The number of full waves increases from 0 mOsm, peaks at 350  
 428 mOsm and then decreases with higher osmolarities. The proportion of egg chambers that show  
 429 a cortical increase peaks at 0 mOsm and then decreases with higher osmolarities. The proportion  
 430 of partial waves increases with higher osmolarities. The proportion of no wave increases with  
 431 higher osmolarities (n = 30 per osmolarity). This data was analysed statistically using Fisher's  
 432 exact test with  $P < 0.05$  considered significant. The proportion of full calcium waves observed at  
 433 350 mOsm is significantly higher ( $P < 0.05$ ) than full waves at all other osmolarities shown. The  
 434 proportion of cortical increases observed at 0 mOsm is significantly higher ( $P < 0.01$ ) than cortical  
 435 increases at all measured osmolarities shown. The proportion of partial waves observed at 570  
 436 mOsm is significantly higher ( $P < 0.01$ ) than partial waves at all measured osmolarities, except 450  
 437 mOsm. The proportion of no waves observed at 570 mOsm is significantly higher ( $P < 0.001$ ) than  
 438 no waves at all other osmolarities shown.

439 (B-D') Mature egg chambers expressing *jupiter-mCherry* to visualise microtubules in the meiotic  
 440 spindle. Before activation (pre) the spindle is in the shape of an ellipse, with dark regions in the  
 441 middle where the DNA resides (B-D). Post-incubation images were taken 10 minutes after the  
 442 addition of the solution. The spindle shows an increase in width following the addition of AB and  
 443 SW (260 mOsm) (B-C'), however, the width does not change upon the addition of Schneider's  
 444 *Drosophila* Medium (Sch) (n = 15). Scale bar 2µm. Maximum projection 3 µm.

445 (E) Graph showing a change in spindle width upon addition of AB, SW and Sch. The data was  
446 analysed statistically using an unpaired T-test with  $P < 0.05$  considered significant. The spindle  
447 shows a significant increase in width by  $2.1 \mu\text{m}$  (a 1.7x increase) ( $P < 0.001$ ) upon the addition of  
448 AB or SW (260 mOsm). There is no significant change in width upon the addition of Sch ( $n = 15$   
449 per solution).

450 (F-F') Time-series of *ex vivo* egg chamber expressing *me31B::GFP* following the addition of SW  
451 (260 mOsm). P bodies appear as granular puncta pre-SW and disperse following the addition of  
452 SW, consistent with the addition of AB ( $n = 15$ ). Post-incubation images were taken at 10 minutes  
453 after incubation of solution. Scale bar  $60 \mu\text{m}$ . Maximum projection  $40 \mu\text{m}$ .

454 **FIGURE 3**

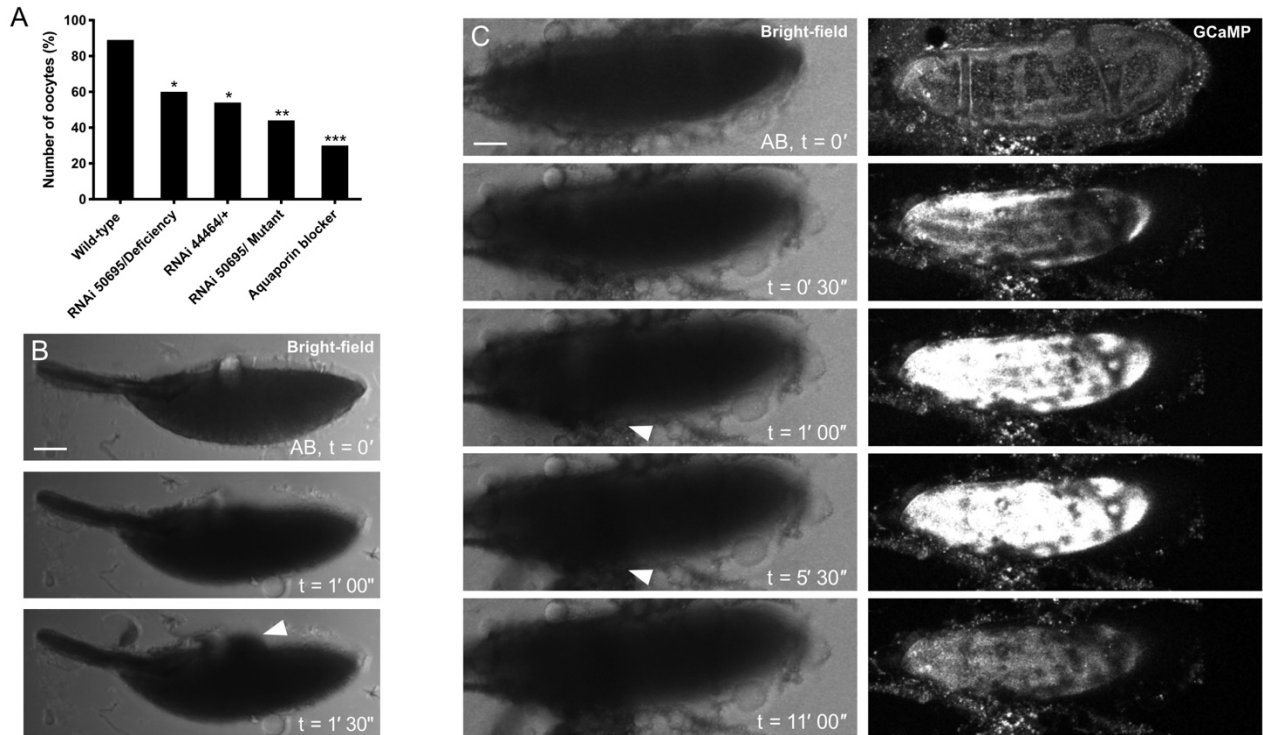

455 **Figure 3. Water homeostasis is required for egg activation**

456 (A) The data shows the presence of the calcium wave in Aquaporin depleted backgrounds.  
457 Aquaporin depletion was achieved through knockdown using BL50695 (germline) and BL44464  
458 (germline and somatic) RNAi, deficiency (Df(2R)BSC160/Cyo), *prip* mutant (y1; P{SUPor-  
459 P}PripKG08662) and the broad Aquaporin channel antagonist copper sulfate. Upon the addition  
460 of AB, the number of oocytes with the calcium wave significantly decreased to 50% in the germline  
461 knockdown over the deficiency (n = 25, P<0.05) or mutant (n = 18, P<0.001). A similar significant  
462 decrease was also observed with only one copy knock-down of both somatic and germline Prip  
463 (BL44464) (n = 13, p<0.05). Addition of copper sulfate results in a significant decrease of waves  
464 to approximately 30% (n = 44, P<0.001).

465 (B) Bright-field time series of mature egg chamber in an Aquaporin depleted background (RNAi  
466 50695/deficiency). Upon addition of AB, 50% of the oocytes burst compared to 3% in the wild-  
467 type, with the cytoplasm leaking within 1 minute and 30 seconds (white arrowhead) (n = 120).  
468 Scale bar 60  $\mu$ m. Maximum projection 40  $\mu$ m.

469 (C) Time-series of *ex vivo* mature egg chamber expressing *UAS-myrGCaMP5* and two copies of  
470 *ripped-pocket* RNAi following the addition of AB. The cortical increase appears within 30 seconds  
471 of the addition of AB, which is followed by the oocyte burst and cytoplasm leaking out in 74% of  
472 egg chambers (white arrowhead). The dark spots represent excess tissue and oil droplets. Scale  
473 bar 60  $\mu$ m. Maximum projection 40  $\mu$ m.

474 **FIGURE 4**

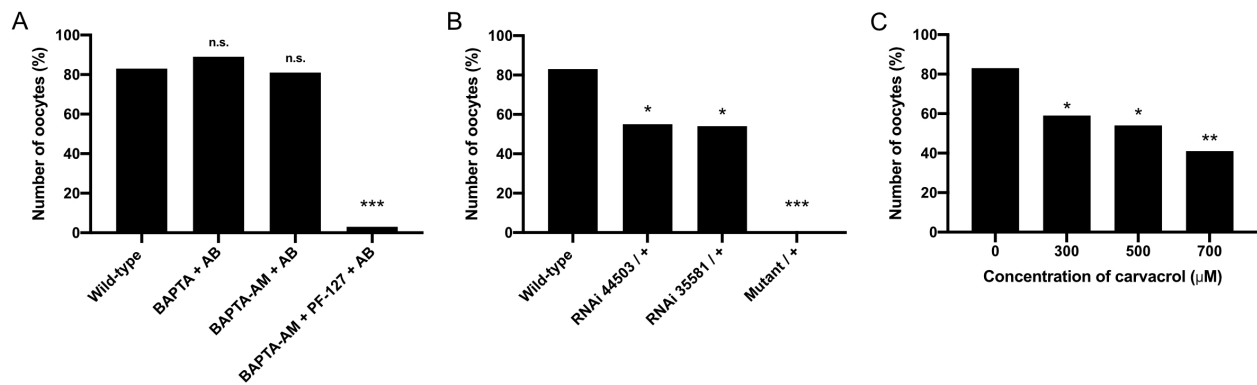

475 **Figure 4. Internal calcium and Trpm channel are required for the calcium wave**

476 (A) The graph shows the presence of the calcium wave in external or internal calcium-depleted  
477 backgrounds. Depletion of external calcium was achieved through the addition of calcium chelator  
478 BAPTA or BAPTA-AM in AB. Depletion of internal calcium was achieved through the addition of  
479 BAPTA-AM and PF-127 in AB. Upon the addition of BAPTA or BAPTA-AM in AB, there was no  
480 significant difference in the number of oocytes with the calcium wave (n = 19 and n = 57). The  
481 addition of BAPTA-AM and PF-127 in AB resulted in a significant decrease in the number of  
482 calcium waves (n = 34, P<0.001). Data was statistically analysed using Fisher's exact test.

483 (B-C) The graphs show the presence of the calcium waves in Trpm depleted backgrounds. Trpm  
484 depletion was achieved through knockdown using BL44503 (somatic and germline) and BL35581  
485 (germline) RNAi, *trpm* mutant (y1 w67c23; P{EPgy2}TrpmEY01618/CyO) (B) and (C) the broad  
486 Trpm blocker carvacrol. Upon the addition of AB (B), the number of the oocytes with the calcium  
487 wave significantly decreased with only one copy knockdown of both somatic and germline Trpm  
488 (BL44503) (n = 96, P<0.01) and germline only (BL35581) (n = 35, P<0.05). A significant decrease  
489 in the number of the calcium waves was also observed in Trpm mutant background (n = 14,  
490 P<0.001). (C) A significant decrease in the number of the calcium waves was also observed with  
491 the addition of AB with the broad Trpm blocker carvacrol in a concentration-dependent manner  
492 of 300µM (n = 27, P<0.05), 500µM (n = 24, P<0.05) and 700µM (n = 24, P<0.01). Data was  
493 statistically analysed using Fisher's exact test.

494 **FIGURE 5**

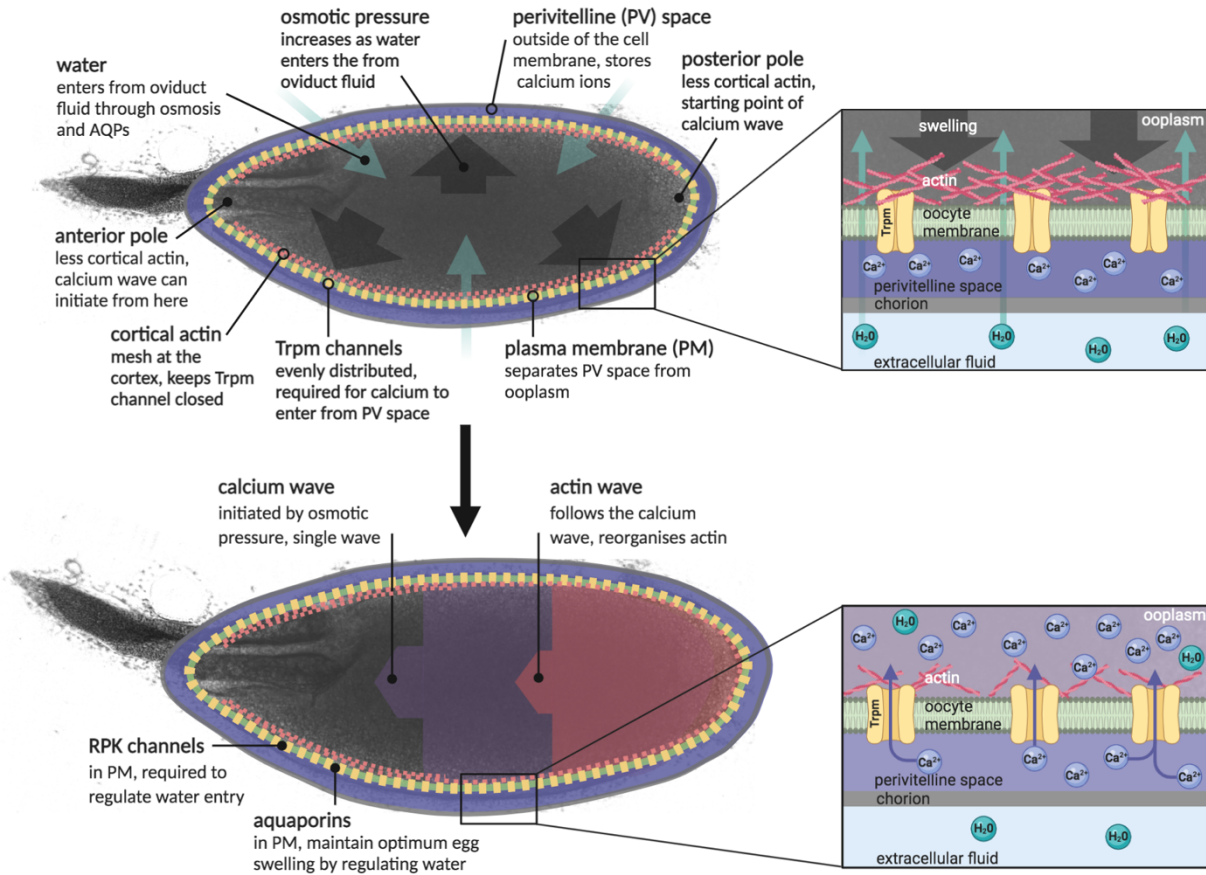

495 **Figure 5. Model of *Drosophila* egg activation**

496 Essential components and processes of *Drosophila* egg activation are outlined in the  
497 panels. A comprehensive description of the model is included in the discussion. Created  
498 with BioRender.com.

499 **REFERENCES**

- 500 1. Whitaker M. 2006 Calcium at Fertilization and in Early Development. *Physiol Rev* **86**,  
501 25--88. (doi:10.1152/physrev.00023.2005)
- 502 2. Horner VL, Wolfner MF. 2008 Transitioning from egg to embryo: Triggers and  
503 mechanisms of egg activation. *Dev Dynam* **237**, 527--544. (doi:10.1002/dvdy.21454)
- 504 3. Swann K, Lai FA. 2016 Egg Activation at Fertilization by a Soluble Sperm Protein.  
505 *Physiol Rev* **96**, 127--149. (doi:10.1152/physrev.00012.2015)
- 506 4. Stricker SA. 1999 Comparative Biology of Calcium Signaling during Fertilization and  
507 Egg Activation in Animals. *Dev Biol* **211**, 157--176. (doi:10.1006/dbio.1999.9340)
- 508 5. York-Andersen AH, Parton RM, Bi CJ, Bromley CL, Davis I, Weil TT. 2015 A single  
509 and rapid calcium wave at egg activation in *Drosophila*. *Biol Open* **4**, 553--560.  
510 (doi:10.1242/bio.201411296)
- 511 6. Kaneuchi T, Sartain CV, Takeo S, Horner VL, Buehner NA, Aigaki T, Wolfner MF.  
512 2015 Calcium waves occur as *Drosophila* oocytes activate. *Proc National Acad Sci* **112**,  
513 791--796. (doi:10.1073/pnas.1420589112)
- 514 7. Parrington J, Davis LC, Galione A, Wessel G. 2007 Flipping the switch: How a sperm  
515 activates the egg at fertilization. *Dev Dynam* **236**, 2027--2038.  
516 (doi:10.1002/dvdy.21255)
- 517 8. Horner VL, Wolfner MF. 2008 Mechanical stimulation by osmotic and hydrostatic  
518 pressure activates *Drosophila* oocytes in vitro in a calcium-dependent manner. *Dev Biol*  
519 **316**, 100--109. (doi:10.1016/j.ydbio.2008.01.014)
- 520 9. Kishimoto T. 1998 Cell cycle arrest and release in starfish oocytes and eggs. *Semin*  
521 *Cell Dev Biol* **9**, 549--557. (doi:10.1006/scdb.1998.0249)
- 522 10. Harada K, Oita E, Chiba K. 2003 Metaphase I arrest of starfish oocytes induced via  
523 the MAP kinase pathway is released by an increase of intracellular pH. *Development*  
524 **130**, 4581--4586. (doi:10.1242/dev.00649)
- 525 11. Lindsay LL, Hertzler PL, Clark WH. 1992 Extracellular Mg<sup>2+</sup> induces an intracellular  
526 Ca<sup>2+</sup> wave during oocyte activation in the marine shrimp *Sicyonia ingentis*. *Dev Biol*  
527 **152**, 94--102. (doi:10.1016/0012-1606(92)90159-e)
- 528 12. Went DF. 1982 Egg Activation and Parthenogenetic Reproduction in Insects. *Biol*  
529 *Rev* **57**, 319--344. (doi:10.1111/j.1469-185x.1982.tb00371.x)
- 530 13. Went DF, Krause G. 1973 Normal Development of Mechanically Activated, Unlaid  
531 Eggs of an Endo-parasitic Hymenopteran. *Nature* **244**, 454--455.  
532 (doi:10.1038/244454a0)

- 533 14. Went DF, Krause G. 1974 Alteration of egg architecture and egg activation in an  
534 endoparasitic Hymenopteran as a result of natural or imitated oviposition. *Wilhelm*  
535 *Roux' Archiv Für Entwicklungsmechanik Der Org* **175**, 173--184.  
536 (doi:10.1007/bf00582090)
- 537 15. Mahowald AP, Goralski TJ, Caulton JH. 1983 In vitro activation of Drosophila eggs.  
538 *Dev Biol* **98**, 437--445. (doi:10.1016/0012-1606(83)90373-1)
- 539 16. Yamamoto DS, Hatakeyama M, Matsuoka H. 2013 Artificial activation of mature  
540 unfertilized eggs in the malaria vector mosquito, *Anopheles stephensi* (Diptera,  
541 Culicidae). *J Exp Biol* **216**, 2960--2966. (doi:10.1242/jeb.084293)
- 542 17. Oishi K, Sawa M, Hatakeyama M, Kageyama Y. 1993 Genetics and biology of the  
543 sawfly, *Athalia rosae* (Hymenoptera). *Genetica* **88**, 119--127. (doi:10.1007/bf02424468)
- 544 18. Tojo K, Machida R. 1998 Early embryonic development of the mayfly *Ephemera*  
545 *japonica* McLachlan (Insecta: Ephemeroptera, Ephemeridae). *J Morphol* **238**, 327--335.  
546 (doi:10.1002/(sici)1097-4687(199812)238:3<327::aid-jmor4>3.0.co;2-j)
- 547 19. Li J. 1994 Egg chorion tanning in *Aedes aegypti* mosquito. *Comp Biochem*  
548 *Physiology Part Physiology* **109**, 835--843. (doi:10.1016/0300-9629(94)90231-3)
- 549 20. Li JS, Li J. 2006 Major chorion proteins and their crosslinking during chorion  
550 hardening in *Aedes aegypti* mosquitoes. *Insect Biochem Molec* **36**, 954--964.  
551 (doi:10.1016/j.ibmb.2006.09.006)
- 552 21. Doane WW. 1960 Completion of Meiosis in Uninseminated Eggs of *Drosophila*  
553 *melanogaster*. *Science* **132**, 677--678. (doi:10.1126/science.132.3428.677)
- 554 22. Sartain CV, Wolfner MF. 2013 Calcium and egg activation in *Drosophila*. *Cell*  
555 *Calcium* **53**, 10--15. (doi:10.1016/j.ceca.2012.11.008)
- 556 23. York-Andersen AH, Hu Q, Wood BW, Wolfner MF, Weil TT. 2020 A calcium-  
557 mediated actin redistribution at egg activation in *Drosophila*. *Mol Reprod Dev* **87**, 293--  
558 304. (doi:10.1002/mrd.23311)
- 559 24. Lin H, Spradling AC. 1993 Germline Stem Cell Division and Egg Chamber  
560 Development in Transplanted *Drosophila* Germaria. *Dev Biol* **159**, 140--152.  
561 (doi:10.1006/dbio.1993.1228)
- 562 25. Hu Q, Vélez-Avilés AN, Wolfner MF. 2020 *Drosophila* Plc21C is involved in calcium  
563 wave propagation during egg activation. *Micropublication Biology* **2020**,  
564 10.17912/micropub.biology.000235. (doi:10.17912/micropub.biology.000235)
- 565 26. Hu Q, Wolfner MF. 2019 The *Drosophila* Trpm channel mediates calcium influx  
566 during egg activation. *Proc National Acad Sci* **116**, 18994--19000.  
567 (doi:10.1073/pnas.1906967116)

- 568 27. Hu Q, Wolfner MF. 2020 Regulation of Trpm activation and calcium wave initiation  
569 during *Drosophila* egg activation. *Mol Reprod Dev* **87**, 880--886.  
570 (doi:10.1002/mrd.23403)
- 571 28. Endow SA, Komma DJ. 1997 Spindle Dynamics during Meiosis in *Drosophila*  
572 Oocytes. *J Cell Biology* **137**, 1321--1336. (doi:10.1083/jcb.137.6.1321)
- 573 29. Page AW, Orr-Weaver TL. 1997 Activation of the Meiotic Divisions in *Drosophila*  
574 Oocytes. *Dev Biol* **183**, 195--207. (doi:10.1006/dbio.1997.8506)
- 575 30. Heifetz Y, Yu J, Wolfner MF. 2001 Ovulation Triggers Activation of *Drosophila*  
576 Oocytes. *Dev Biol* **234**, 416--424. (doi:10.1006/dbio.2001.0246)
- 577 31. Weil TT *et al.* 2012 *Drosophila* patterning is established by differential association of  
578 mRNAs with P bodies. *Nat Cell Biol* **14**, 1305--1313. (doi:10.1038/ncb2627)
- 579 32. Verkman AS. 2011 Aquaporins at a glance. *J Cell Sci* **124**, 2107--2112.  
580 (doi:10.1242/jcs.079467)
- 581 33. Verkman AS, Anderson MO, Papadopoulos MC. 2014 Aquaporins: important but  
582 elusive drug targets. *Nat Rev Drug Discov* **13**, 259--277. (doi:10.1038/nrd4226)
- 583 34. Chalfie M, Wolinsky E. 1990 The identification and suppression of inherited  
584 neurodegeneration in *Caenorhabditis elegans*. *Nature* **345**, 410--416.  
585 (doi:10.1038/345410a0)
- 586 35. Driscoll M, Chalfie M. 1991 The *mec-4* gene is a member of a family of  
587 *Caenorhabditis elegans* genes that can mutate to induce neuronal degeneration. *Nature*  
588 **349**, 588--593. (doi:10.1038/349588a0)
- 589 36. García-Añoveros J, Ma C, Chalfie M. 1995 Regulation of *Caenorhabditis elegans*  
590 degenerin proteins by a putative extracellular domain. *Curr Biol* **5**, 441--448.  
591 (doi:10.1016/s0960-9822(95)00085-6)
- 592 37. Meer JM van der, Jaffe LF. 1983 Elemental composition of the perivitelline fluid in  
593 early *Drosophila* embryos. *Dev Biol* **95**, 249--252. (doi:10.1016/0012-1606(83)90025-8)
- 594 38. Bellen HJ *et al.* 2004 The BDGP Gene Disruption Project Single Transposon  
595 Insertions Associated With 40 of *Drosophila* Genes. *Genetics* **167**, 761--781.  
596 (doi:10.1534/genetics.104.026427)
- 597 39. Hofmann T, Chubanov V, Chen X, Dietz AS, Gudermann T, Montell C. 2010  
598 *Drosophila* TRPM Channel Is Essential for the Control of Extracellular Magnesium  
599 Levels. *Plos One* **5**, e10519. (doi:10.1371/journal.pone.0010519) Hofmann T,  
600 Chubanov V, Chen X, Dietz AS, Gudermann T, Montell C. 2010 *Drosophila* TRPM  
601 Channel Is Essential for the Control of Extracellular Magnesium Levels. *Plos One* **5**,  
602 e10519. (doi:10.1371/journal.pone.0010519)



- 603 40. Chubanov V, Schäfer S, Ferioli S, Gudermann T. 2014 Natural and Synthetic  
604 Modulators of the TRPM7 Channel. *Cells* **3**, 1089--1101. (doi:10.3390/cells3041089)
- 605 41. O'Connor E, Kimelberg H. 1993 Role of calcium in astrocyte volume regulation and  
606 in the release of ions and amino acids. *J Neurosci* **13**, 2638--2650.  
607 (doi:10.1523/jneurosci.13-06-02638.1993)
- 608 42. MacLeod RJ, Hamilton JR. 1999 Increases in Intracellular pH and Ca<sup>2+</sup> are  
609 Essential for K<sup>+</sup> Channel Activation After Modest 'Physiological' Swelling in Villus  
610 Epithelial Cells. *J Membr Biology* **172**, 47--58. (doi:10.1007/s002329900582)
- 611 43. Weskamp M, Seidl W, Grissmer S. 2000 Characterization of the Increase in [Ca<sup>2+</sup>]<sub>i</sub>  
612 During Hypotonic Shock and the Involvement of Ca<sup>2+</sup>-activated K<sup>+</sup> Channels in the  
613 Regulatory Volume Decrease in Human Osteoblast-like Cells. *J Membr Biology* **178**, 11-  
614 -20. (doi:10.1007/s002320010010)
- 615 44. Shen M, Chou C, Browning JA, Wilkins RJ, Ellory JC. 2001 Human cervical cancer  
616 cells use Ca<sup>2+</sup> signalling, protein tyrosine phosphorylation and MAP kinase in  
617 regulatory volume decrease. *J Physiology* **537**, 347--362. (doi:10.1111/j.1469-  
618 7793.2001.00347.x)
- 619 45. Kultz D, Burg MB. 1998 Intracellular Signaling in Response to Osmotic Stress.  
620 *Contrib Nephrol* **123**, 94--109. (doi:10.1159/000059923)
- 621 46. Kliewer JW. 1961 Weight and Hatchability of *Aedes aegypti* Eggs (Diptera:  
622 Culicidae)1. *Ann Entomol Soc Am* **54**, 912--917. (doi:10.1093/aesa/54.6.912)
- 623 47. Mazzochi C, Bubien JK, Smith PR, Benos DJ. 2006 The Carboxyl Terminus of the  
624  $\alpha$ -Subunit of the Amiloride-sensitive Epithelial Sodium Channel Binds to F-actin. *J Biol*  
625 *Chem* **281**, 6528--6538. (doi:10.1074/jbc.m509386200)
- 626 48. Kusche-Vihrog K, Urbanova K, Blanqué A, Wilhelmi M, Schillers H, Kliche K,  
627 Pavenstädt H, Brand E, Oberleithner H. 2011 C-Reactive Protein Makes Human  
628 Endothelium Stiff and Tight. *Hypertension* **57**, 231--237.  
629 (doi:10.1161/hypertensionaha.110.163444)
- 630 49. Grimm C, Kraft R, Sauerbruch S, Schultz G, Harteneck C. 2003 Molecular and  
631 Functional Characterization of the Melastatin-related Cation Channel TRPM3. *J Biol*  
632 *Chem* **278**, 21493--21501. (doi:10.1074/jbc.m300945200)
- 633 50. Liedtke W, Choe Y, Martí-Renom MA, Bell AM, Denis CS, AndrejŠali, Hudspeth AJ,  
634 Friedman JM, Heller S. 2000 Vanilloid Receptor-Related Osmotically Activated Channel  
635 (VR-OAC), a Candidate Vertebrate Osmoreceptor. *Cell* **103**, 525--535.  
636 (doi:10.1016/s0092-8674(00)00143-4)
- 637 51. Strotmann R, Harteneck C, Nunnenmacher K, Schultz G, Plant TD. 2000 OTRPC4,  
638 a nonselective cation channel that confers sensitivity to extracellular osmolarity. *Nat Cell*  
639 *Biol* **2**, 695--702. (doi:10.1038/35036318)

- 640 52. Naeini RS, Witty M-F, Séguéla P, Bourque CW. 2006 An N-terminal variant of Trpv1  
641 channel is required for osmosensory transduction. *Nat Neurosci* **9**, 93--98.  
642 (doi:10.1038/nn1614)
- 643 53. Ciura S, Liedtke W, Bourque CW. 2011 Hypertonicity Sensing in Organum  
644 Vasculosum Lamina Terminalis Neurons: A Mechanical Process Involving TRPV1 But  
645 Not TRPV4. *J Neurosci* **31**, 14669--14676. (doi:10.1523/jneurosci.1420-11.2011)
- 646 54. Methfessel C, Witzemann V, Takahashi T, Mishina M, Numa S, Sakmann B. 1986  
647 Patch clamp measurements onnXenopus laevis oocytes: currents through endogenous  
648 channels and implanted acetylcholine receptor and sodium channels. *Pflügers Archiv*  
649 **407**, 577--588. (doi:10.1007/bf00582635)
- 650 55. Lee HC, Yoon S-Y, Lykke-Hartmann K, Fissore RA, Carvacho I. 2016 TRPV3  
651 channels mediate Ca<sup>2+</sup> influx induced by 2-APB in mouse eggs. *Cell Calcium* **59**, 21--  
652 31. (doi:10.1016/j.ceca.2015.12.001)
- 653 56. Carvacho I, Ardestani G, Lee HC, McGarvey K, Fissore RA, Lykke-Hartmann K.  
654 2016 TRPM7-like channels are functionally expressed in oocytes and modulate post-  
655 fertilization embryo development in mouse. *Sci Rep-uk* **6**, 34236.  
656 (doi:10.1038/srep34236)
- 657 57. Takayama J, Onami S. 2016 The Sperm TRP-3 Channel Mediates the Onset of a  
658 Ca<sup>2+</sup> Wave in the Fertilized C. elegans Oocyte. *Cell Reports* **15**, 625--637.  
659 (doi:10.1016/j.celrep.2016.03.040)
- 660 58. Jaffe LF. 2008 Calcium waves. *Philosophical Transactions Royal Soc B Biological*  
661 *Sci* **363**, 1311--1317. (doi:10.1098/rstb.2007.2249)
- 662 59. Jaffe LF. 2002 On the conservation of fast calcium wave speeds. *Cell Calcium* **32**,  
663 217--229. (doi:10.1016/s0143416002001574)
- 664 60. Digonnet C, Aldon D, Leduc N, Dumas C, Rougier M. 1997 First evidence of a  
665 calcium transient in flowering plants at fertilization. *Dev Camb Engl* **124**, 2867--74.
- 666 61. Antoine AF, Faure J-E, Cordeiro S, Dumas C, Rougier M, Feijó JA. 2000 A calcium  
667 influx is triggered and propagates in the zygote as a wavefront during in vitro fertilization  
668 of flowering plants. *Proc National Acad Sci* **97**, 10643--10648.  
669 (doi:10.1073/pnas.180243697)
- 670 62. Antoine AF, Dumas C, Faure J-E, Feijó JA, Rougier M. 2001 Egg activation in  
671 flowering plants. *Sex Plant Reprod* **14**, 21--26. (doi:10.1007/s004970100088)
- 672 63. Nakamura A, Amikura R, Hanyu K, Kobayashi S. 2001 Me31B silences translation  
673 of oocyte-localizing RNAs through the formation of cytoplasmic RNP complex during  
674 Drosophila oogenesis. *Dev Camb Engl* **128**, 3233--42.

675 64. Derrick CJ, York-Andersen AH, Weil TT. 2016 Imaging Calcium in *Drosophila* at  
676 Egg Activation. *J Vis Exp* (doi:10.3791/54311)
